# Supplementary material for: Epigenetic repression of phosphatidylethanolamine N-methyltransferase (PEMT) in BRCA1-mutated breast cancer
Source: PubMed Central journal article supplement (PMC4012741; doi:10.18632/oncotarget.1800), 2014-02-27
Supplement: oncotarget-05-1315-s002.pdf [file oncotarget-05-1315-s002.pdf]

**Supplementary Table 1.** Prognostic factors for overall survival by multivariate Cox regression analysis

| <b>Variable</b>                            | <b>RR</b> | <b>95% CI</b> | <b>P</b> |
|--------------------------------------------|-----------|---------------|----------|
| <b>Age at diagnosis</b> (> 50 y vs ≤ 50 y) | 1.090     | 0.992-1.198   | 0.074    |
| <b>Menstrual status</b> (Post vs Pre)      | 0.312     | 0.032-3.005   | 0.314    |
| <b>Tumor size</b> (> 5 cm vs ≤ 5 cm)       | 0.911     | 0.177-4.677   | 0.911    |
| <b>Histological grade</b> (III vs I-II)    | 0.939     | 0.117-7.523   | 0.953    |
| <b>LN status</b> (Pos vs Neg)              | 4.533     | 0.790-26.002  | 0.090    |
| <b>ER status</b> (Pos vs Neg)              | 0.144     | 0.010-2.003   | 0.149    |
| <b>PR status</b> (Pos vs Neg)              | 3.784     | 0.600-23.853  | 0.157    |
| <b>c-erbB-2 status</b> (Pos vs Neg)        | 2.054     | 0.381-11.076  | 0.403    |
| <b>p53 status</b> (Pos vs Neg)             | 0.182     | 0.019-1.711   | 0.136    |
| <b>Ki67 status</b> (Pos vs Neg)            | 2.308     | 0.190-28.048  | 0.511    |
| <b>E-cadherin status</b> (Pos vs Neg)      | 0.486     | 0.066-3.588   | 0.479    |
| <b>Methylation</b> (M vs UM)               | 0.422     | 0.057-3.099   | 0.396    |

**List of abbreviations used:** Post, postmenopausal; Pre, premenopausal; LN, lymph node; ER, estrogen receptor; PR, progesterone receptor; Pos, positive; Neg, negative; M, methylated; UM, unmethylated; RR, relative risk; CI, confidence interval.

**Supplementary Table 2.** Clinical characteristics for the 68 BRCA1-mutated breast cancer patients

| Case | Age | Grade | LN | ER | PR | c-erbB-2 | p53 | Ki67 | E-cadherin | Exon | Mutation       | AA change   | Mutation type <sup>a</sup> |
|------|-----|-------|----|----|----|----------|-----|------|------------|------|----------------|-------------|----------------------------|
| 1    | 49  | I     | +  | -  | +  | +        | -   | +    | +          | 2    | c.65 T>A       | p.L22X      | NS                         |
| 2    | 35  | III   | +  | -  | +  | -        | -   | +    | +          | 2    | c.72 T>A       | p.C24X      | NS                         |
| 3    | 41  | II    | +  | -  | -  | -        | -   | +    | +          | 3    | c.120 C>G      | p.D40E      | MS                         |
| 4    | 85  | III   | +  | +  | +  | -        | -   | +    | -          | 5    | c.168 A>T      | p.K56N      | MS                         |
| 5    | 62  | III   | +  | -  | -  | +        | -   | +    | -          | 5    | c.199 G>C      | p.D67H      | MS                         |
| 6    | 47  | III   | +  | -  | +  | +        | -   | +    | -          | 6    | c.213 G>C      | p.R71S      | MS                         |
| 7    | 52  | III   | +  | -  | +  | +        | -   | +    | -          | 5    | c.197-198delAT | p.N66RfsX14 | FS                         |
| 8    | 75  | I     | -  | -  | -  | -        | -   | +    | +          | 6    | c.243 A>T      | p.Q81H      | MS                         |
| 9    | 60  | III   | -  | -  | -  | -        | -   | +    | +          | 6    | c.273 T>A      | p.C91X      | NS                         |
| 10   | 60  | I     | +  | -  | -  | +        | +   | +    | -          | 7    | c.317 A>T      | p.N106I     | MS                         |
| 11   | 36  | II    | -  | +  | +  | -        | +   | +    | +          | 7    | c.349 C>G      | p.H117D     | MS                         |
| 12   | 45  | III   | +  | -  | -  | -        | -   | +    | +          | 7    | c.390 C>G      | p.Y130X     | NS                         |
| 13   | 70  | III   | -  | -  | -  | +        | +   | +    | +          | 7    | c.390delC      | p.Y130X     | NS                         |
| 14   | 53  | I     | +  | -  | -  | +        | -   | +    | +          | 8    | c.470-471delCT | p.S157X     | NS                         |
| 15   | 45  | III   | +  | -  | -  | +        | +   | +    | +          | 8    | c.512 T>C      | p.I171T     | MS                         |
| 16   | 56  | II    | +  | +  | -  | -        | +   | +    | +          | 10   | c.635 C>G      | p.T212S     | MS                         |
| 17   | 69  | II    | -  | +  | +  | -        | +   | -    | +          | 11   | c.1117 delA    | p.I373X     | NS                         |
| 18   | 60  | III   | -  | +  | +  | -        | -   | -    | +          | 11   | c.2566 T>C     | p.Y856H     | MS                         |

|    |    |     |   |   |   |   |   |   |   |   |    |                  |              |     |
|----|----|-----|---|---|---|---|---|---|---|---|----|------------------|--------------|-----|
| 19 | 43 | II  | + | - | + | + | + | - | - | + | 11 | c.1245-1246delTC | p.L416KfsX3  | FS  |
| 20 | 56 | III | - | + | + | - | - | + | + | + | 11 | c.2363 T>C       | p.V788A      | MS  |
| 21 | 67 | I   | - | - | - | + | + | + | - | - | 11 | c.1475 T>C       | p.I492T      | MS  |
| 22 | 41 | II  | - | + | + | - | + | - | - | - | 11 | c.2429 A>G       | p.N810S      | MS  |
| 23 | 58 | I   | - | - | - | - | - | + | + | + | 11 | c.1808-1809delCA | p.S603X      | NIS |
| 24 | 57 | II  | - | - | - | - | + | + | + | + | 11 | c.3710 C>T       | p.A1237V     | MS  |
| 25 | 69 | III | - | - | - | + | + | + | + | + | 11 | c.1918 C>G       | p.Q640E      | MS  |
| 26 | 52 | III | - | + | - | - | - | - | - | - | 11 | c.2212 G>A       | p.V738I      | MS  |
| 27 | 57 | II  | - | + | + | - | - | + | + | + | 11 | c.2312 T>C       | p.L771S      | MS  |
| 28 | 55 | I   | - | + | + | - | + | + | + | + | 11 | c.2363 T>C       | p.V788A      | MS  |
| 29 | 50 | III | - | + | + | - | + | + | + | + | 11 | c.1492 C>G       | p.L498V      | MS  |
| 30 | 55 | II  | + | - | - | + | - | + | + | + | 11 | c.2741 A>G       | p.E914G      | MS  |
| 31 | 75 | II  | - | - | - | + | - | + | + | + | 11 | c.1791 A>T       | p.E597D      | MS  |
| 32 | 57 | II  | + | - | + | + | + | + | + | + | 11 | c.2741 A>G       | p.E914G      | MS  |
| 33 | 49 | I   | - | - | + | - | - | + | + | + | 2  | c.61 A>G         | p.I21V       | MS  |
| 34 | 68 | II  | - | + | + | - | - | + | + | + | 11 | c.1010delA       | p.K339RfsX2  | FS  |
| 35 | 61 | II  | - | + | + | + | - | + | + | + | 3  | c.123 C>G        | p.H41Q       | MS  |
| 36 | 77 | I   | - | + | + | - | - | - | - | - | 11 | c.4046_4047insG  | p.E1352GfsX4 | FS  |
| 37 | 53 | II  | + | - | - | + | + | + | + | + | 14 | c.4372 C>T       | p.Q1458X     | NIS |
| 38 | 80 | II  | - | + | + | - | - | + | + | + | 11 | c.1974 G>C       | p.M658I      | MS  |

|    |    |    |   |   |   |   |   |   |   |   |    |                  |               |    |
|----|----|----|---|---|---|---|---|---|---|---|----|------------------|---------------|----|
| 39 | 80 | I  | + | + | + | - | + | - | + | + | 24 | c.5666 G>C       | p.G1889A      | MS |
| 40 | 62 | II | - | + | + | + | + | - | + | + | 11 | c.2138-2139delCA | p.S713X       | NS |
| 41 | 87 | II | - | + | + | - | - | - | + | + | 11 | c.2408 G>C       | p.S803T       | MS |
| 42 | 48 | I  | - | + | + | - | + | - | - | + | 24 | c.6677 C>G       | p.S2226X      | NS |
| 43 | 47 | II | + | + | + | - | - | + | + | + | 11 | c.2521 C>G       | p.R841G       | MS |
| 44 | 57 | II | - | + | + | + | + | - | + | + | 11 | c.2212_2213insC  | p.V738AfsX1   | FS |
| 45 | 49 | II | - | + | + | - | - | + | + | + | 11 | c.2954 C>G       | p.P985R       | MS |
| 46 | 49 | II | - | + | + | - | - | - | + | + | 11 | c.3290 G>C       | p.S1097T      | MS |
| 47 | 56 | I  | + | + | + | - | - | - | + | + | 11 | c.3620-3621delAG | p.K1208IfsX11 | FS |
| 48 | 28 | II | + | + | + | + | + | + | + | + | 11 | c.3827 T>A       | p.L1276X      | NS |
| 49 | 73 | II | - | + | + | - | - | - | + | + | 11 | c.3816 C>G       | p.N1272K      | MS |
| 50 | 57 | I  | + | - | - | + | + | + | + | + | 11 | c.4135 T>A       | p.S1379T      | MS |
| 51 | 59 | II | - | - | + | - | - | - | + | + | 12 | c.4201 C>G       | p.Q140IE      | MS |
| 52 | 46 | II | - | - | - | + | + | - | - | - | 12 | c.4257 A>T       | p.E1419D      | MS |
| 53 | 61 | I  | - | + | + | - | - | - | + | + | 12 | c.4297-4298delAT | p.I1433KfsX2  | FS |
| 54 | 49 | II | + | + | + | + | + | - | + | + | 11 | c.2954 C>G       | p.P985R       | MS |
| 55 | 55 | II | + | + | + | - | - | - | + | + | 7  | c.349 C>G        | p.H117D       | MS |
| 56 | 41 | I  | + | + | + | + | + | + | + | + | 12 | c.4200-4201delGC | p.M1400IfsX3  | FS |
| 57 | 79 | II | - | + | - | - | - | + | + | + | 13 | c.4404 T>A       | p.N1468K      | MS |
| 58 | 49 | II | - | + | + | - | - | - | - | - | 14 | c.4578 G>C       | p.E1526D      | MS |

|    |    |     |   |   |   |   |   |   |   |    |                 |              |    |
|----|----|-----|---|---|---|---|---|---|---|----|-----------------|--------------|----|
| 59 | 56 | I   | - | - | - | + | + | - | + | 14 | c.4656 C>G      | p.Y1552X     | NS |
| 60 | 56 | III | - | + | + | + | - | + | + | 15 | c.4820 T>A      | p.V1607D     | MS |
| 61 | 45 | III | - | + | + | + | - | + | + | 22 | c.5379 G>C      | p.K1793N     | MS |
| 62 | 50 | II  | - | - | - | - | - | + | - | 20 | c.5255 C>G      | p.A1752G     | MS |
| 63 | 67 | III | - | - | - | - | - | + | - | 22 | c.5390 C>A      | p.S1797X     | NS |
| 64 | 58 | III | + | + | + | - | - | + | + | 24 | c.5588 A>T      | p.Y1863F     | MS |
| 65 | 71 | II  | + | + | + | - | - | + | + | 24 | c.5671 C>G      | p.P1891A     | MS |
| 66 | 38 | I   | + | - | - | + | - | + | + | 24 | c.5588 A>T      | p.Y1863F     | MS |
| 67 | 52 | III | + | - | - | - | + | + | - | 24 | c.6324_6325insG | p.C2109VfsX1 | FS |
| 68 | 56 | I   | - | + | + | + | - | + | + | 24 | c.5883 C>G      | p.F1961L     | MS |

a, NS: nonsense mutation; MS: missense mutation; FS: Frameshift mutation

**Supplementary Table 3.** List of commercial antibodies and lentiviral particles

| <b>Antibody</b> | <b>Company (catalog number)</b> | <b>Description</b> |
|-----------------|---------------------------------|--------------------|
| H3K9Ac          | Abcam (ab4441)                  | ChIP               |
| H3K18Ac         | Abcam (ab1191)                  | ChIP               |
| H3K27Ac         | Millipore (07-360)              | ChIP               |
| H3K4me1         | Abcam (ab8895)                  | ChIP               |
| H3K4me2         | Abcam (ab7766)                  | ChIP               |
| H3K4me3         | Abcam (ab8580)                  | ChIP               |
| H3K36me3        | Abcam (ab9050)                  | ChIP               |
| H3K79me         | Abcam (ab2886)                  | ChIP               |
| H3K9me          | Abcam (ab9045)                  | ChIP               |
| H3K9me2         | Millipore (07-441)              | ChIP               |
| H3K9me3         | Abcam (ab8898)                  | ChIP               |
| H3K27me         | Millipore (07-448)              | ChIP               |
| H3K27me2        | Millipore (07-452)              | ChIP               |
| H3K27me3        | Millipore (07-449)              | ChIP               |
| PEMT            | Santa Cruz (sc-130842)          | WB, IHC            |
| GCN5            | Santa Cruz (sc-37946-V)         | shRNAs             |
| PCAF            | Santa Cruz (sc-36198-V)         | shRNAs             |
| HLCS            | Santa Cruz (sc-72198-V)         | shRNAs             |
| EHMT1           | Santa Cruz (sc-62261-V)         | shRNAs             |
| GCN5            | Santa Cruz (sc-20698)           | WB                 |
| PCAF            | Santa Cruz (sc-13124)           | WB                 |
| HLCS            | Santa Cruz (sc-23734)           | WB                 |
| EHMT1           | Santa Cruz (sc-130747)          | WB                 |

**List of abbreviations used:** ChIP, chromatin immunoprecipitation; shRNAs, short hairpin RNAs;

WB, western blotting; IHC, immunohistochemistry.

**Supplementary Table 4.** Primers used in this study

| <b>Gene</b>      | <b>Primers</b>                  | <b>Description</b>                |
|------------------|---------------------------------|-----------------------------------|
| PEMT1-BSP-F      | 5'- GAATGAATGAAGGAAAAAATGAG     | Methylation analysis for PEMT     |
| PEMT1-BSP-R      | 5'- TCAATAAACACAATCCCAAAAA      | promoter 1 (Round I)              |
| PEMT1-BSP-F      | 5'- TGAATGAAGGAAAAAATGAG        | Methylation analysis for PEMT     |
| PEMT1-BSP-R      | 5'- CCCCATACCTAAAACTAA          | promoter 1 (Round II)             |
| PEMT2-BSP-F      | 5'- TTTTATGTGGAAAAATAGGG        | Methylation analysis for PEMT     |
| PEMT2-BSP-R      | 5'- ACACATAAACAAACAACAAAC       | promoter 2 (Round I)              |
| PEMT2-BSP-F      | 5'- TTATTTTTGTTGTTTAGGTTGGAGTG  | Methylation analysis for PEMT     |
| PEMT2-BSP-R      | 5'- ACAAATCCTCCTAAAATCCATCAC    | promoter 2 (Round II)             |
| PEMT3-BSP-F      | 5'- GTAGAGATAGGGTTTTATTA        | Methylation analysis for PEMT     |
| PEMT3-BSP-R      | 5'- CCAAATAAAAAAATCAACACCTC     | promoter 3 (Round I)              |
| PEMT3-BSP-F      | 5'- GAGGGAGATTTTGTTTTAAA        | Methylation analysis for PEMT     |
| PEMT3-BSP-R      | 5'- AACATAATAATATACCTCTCCTC     | promoter 3 (Round II)             |
| PEMT1-MSP-MF     | 5'- GTTTTTAGTTTTATTGTTGTTAGGTAA | Methylation analysis for PEMT     |
| PEMT1-MSP-MR     | 5'- AAATACCTCTTTATCTAAAACTCACG  | promoter 1                        |
| PEMT1-MSP-UF     | 5'- GTTTTTAGTTTTATTGTTGTTAGGTAA | Methylation analysis for PEMT     |
| PEMT1-MSP-UR     | 5'- AAATACCTCTTTATCTAAAACTCACA  | promoter 1                        |
| PEMT-total-RTP-F | 5'- TCAAGGAGGCGAGAGTGA          | Real-time PCR for transcript 1, 2 |
| PEMT-total-RTP-R | 5'- CCAGGTAGTTGGCTGTGCTT        | and 3                             |
| PEMT1-RTP-F      | 5'- GGATGAAGAGATCTGGGAAC        | Real-time PCR for transcript 1    |
| PEMT1-RTP-R      | 5'- TGAAGGTGATGGTGATGACG        |                                   |
| PEMT2-RTP-F      | 5'- TGAGGCTATTCGTCGGTGAC        | Real-time PCR for transcript 2    |
| PEMT2-RTP-R      | 5'- TGAAGGTGATGGTGATGACG        |                                   |
| PEMT3-RTP-F      | 5'- TTGCTTTTACCTGATTCCTG        | Real-time PCR for transcript 3    |
| PEMT3-RTP-R      | 5'- GATTGAAGGTGATGGTGATG        |                                   |

|                  |                                                 |                                                               |
|------------------|-------------------------------------------------|---------------------------------------------------------------|
| GAPDH-RTP-F      | 5'- AGGTGAAGGTCCGGAGTCA                         | Real-time PCR for GAPDH                                       |
| GAPDH-RTP-R      | 5'- GGTCATTGATGGCAACAA                          |                                                               |
| GCN5-SQP         | Santa Cruz Biotech<br>GCN5 (h)-PR: sc-37946-PR  | Semi-quantitative PCR for GCN5                                |
| PCAF-SQP         | Santa Cruz Biotech<br>PCAF (h)-PR: sc-36198-PR  | Semi-quantitative PCR for PCAF                                |
| HLCS-SQP         | Santa Cruz Biotech<br>HLCS (h)-PR: sc-72198-PR  | Semi-quantitative PCR for HLCS                                |
| EHMT1-SQP        | Santa Cruz Biotech<br>EHMT1 (h)-PR: sc-62261-PR | Semi-quantitative PCR for<br>EHMT1                            |
| PEMT1-ChIP-RTP-F | 5'- TCCAAGGGGATACTGCTAC                         | ChIP for PEMT promoter 1                                      |
| PEMT1-ChIP-RTP-R | 5'- CAACATATTCCGGCCTTCT                         |                                                               |
| PEMT1-ChIP-SQP-F | 5'- GATCCAAGGGGATACTGCTA                        | ChIP for PEMT promoter 1                                      |
| PEMT1-ChIP-SQP-R | 5'- TTCTGGGAAATGTAGTTCCC                        |                                                               |
| PEMT1-Mutation-F | 5'-CTCCTCTAGACGCTGTTGCGAGCCCCC<br>AGATAA        | A point mutation at the site of<br>-132 (C to T) in the first |
| PEMT1-Mutation-R | 5'-TTATCTGGGGGCTCGCAACAGCGTCTA<br>GAGGAG        | promoter of PEMT                                              |

**List of abbreviations used:** BSP, bisulfite-sequencing PCR; MSP, methylation-specific PCR; RTP, real-time PCR; SQP, semi-quantitative PCR; ChIP, chromatin immunoprecipitation; F, forward primer; R, reverse primer; M, methylated; U, unmethylated.
